# Supplementary material
Source: PubMed Central journal article supplement (PMC2784198)
Supplement: NIHMS153741-supplement-supp1.pdf [file NIHMS153741-supplement-supp1.pdf]

**SUPPLEMENTAL Tables**

**Cardiac T2\* Magnetic Resonance for Prediction of Cardiac Complications in Thalassemia Major  
CIRCULATIONAHA/2009/874487**

**Supplemental Table 1: Heart failure**

| Cardiac T2*<br>(ms) | No. in<br>group | No. with<br>heart failure | Per scan (non-nested) |           |      |        | No. in<br>group | No. with<br>heart failure | First scan only                  |           |      |       |
|---------------------|-----------------|---------------------------|-----------------------|-----------|------|--------|-----------------|---------------------------|----------------------------------|-----------|------|-------|
|                     |                 |                           | RR                    | 95% CI    |      | p      |                 |                           | RR                               | 95% CI    |      | p     |
| <6                  | 72              | 34                        | 275                   | 66        | 1144 | <0.001 | 30              | 16                        | 4.44                             | 1.74      | 11.4 | 0.002 |
| 6 to <8             | 98              | 29                        | 172                   | 41        | 722  | <0.001 | 49              | 11                        | 1.87                             | 0.69      | 5.06 | 0.22  |
| 8 to <10            | 108             | 15                        | 81                    | 18        | 353  | <0.001 | 50              | 6                         | 1                                | Reference |      |       |
| 10+                 | 1164            | 2                         | 1                     | Reference |      |        | 523             | 0                         | Not estimable due to zero events |           |      |       |

| Liver T2*<br>(ms) | No. in<br>group | No. with<br>heart failure | Per scan (non-nested) |           |      |       | No. in<br>group | No. with<br>heart failure | First scan only |           |      |      |
|-------------------|-----------------|---------------------------|-----------------------|-----------|------|-------|-----------------|---------------------------|-----------------|-----------|------|------|
|                   |                 |                           | RR                    | 95% CI    |      | p     |                 |                           | RR              | 95% CI    |      | p    |
| <0.96             | 63              | 3                         | 1.20                  | 0.35      | 4.13 | 0.78  | 31              | 1                         | 0.78            | 0.09      | 6.52 | 0.82 |
| 0.96 to <1.4      | 136             | 14                        | 2.59                  | 1.25      | 5.36 | 0.011 | 78              | 8                         | 2.50            | 0.87      | 7.19 | 0.09 |
| 1.4 to <2.7       | 382             | 26                        | 1.71                  | 0.91      | 3.23 | 0.098 | 188             | 11                        | 1.42            | 1.42      | 3.85 | 0.49 |
| 2.7 to <6.3       | 484             | 22                        | 1.14                  | 0.59      | 2.20 | 0.69  | 209             | 7                         | 0.81            | 0.27      | 2.43 | 0.71 |
| 6.3+              | 377             | 15                        | 1                     | Reference |      |       | 146             | 6                         | 1               | Reference |      |      |

| Ferritin<br>µg/L | No. in<br>group | No. with<br>heart failure | Per scan (non-nested) |           |      |       | No. in<br>group | No. with<br>heart failure | First scan only |           |      |       |
|------------------|-----------------|---------------------------|-----------------------|-----------|------|-------|-----------------|---------------------------|-----------------|-----------|------|-------|
|                  |                 |                           | RR                    | 95% CI    |      | p     |                 |                           | RR              | 95% CI    |      | p     |
| ≥2500            | 450             | 35                        | 0.58                  | 0.38      | 0.91 | 0.017 | 215             | 18                        | 0.41            | 0.21      | 0.81 | 0.011 |
| <2500            | 992             | 45                        | 1                     | Reference |      |       | 437             | 15                        | 1               | Reference |      |       |

**Supplemental Table 2: Arrhythmia**

| Cardiac T2*<br>(ms) | No. in<br>group | No. with<br>arrhythmia | Per scan (non-nested) |           |      |        | No. in<br>group | No. with<br>arrhythmia | First scan only |           |      |        |
|---------------------|-----------------|------------------------|-----------------------|-----------|------|--------|-----------------|------------------------|-----------------|-----------|------|--------|
|                     |                 |                        | RR                    | 95% CI    | p    | RR     |                 |                        | 95% CI          | p         |      |        |
| <6                  | 72              | 14                     | 8.42                  | 4.15      | 17.1 | <0.001 | 30              | 6                      | 14.4            | 4.39      | 47.2 | <0.001 |
| 6 to <8             | 98              | 20                     | 8.84                  | 4.63      | 16.9 | <0.001 | 49              | 9                      | 13.2            | 4.43      | 39.5 | <0.001 |
| 8 to <10            | 108             | 16                     | 6.41                  | 3.24      | 12.7 | <0.001 | 50              | 7                      | 10.1            | 3.20      | 31.8 | <0.001 |
| 10 to <15           | 263             | 21                     | 3.46                  | 1.82      | 6.55 | <0.001 | 106             | 8                      | 5.43            | 1.78      | 16.6 | 0.003  |
| 15 to <20           | 165             | 10                     | 2.62                  | 1.20      | 5.73 | 0.015  | 57              | 1                      | 1.26            | 0.15      | 10.8 | 0.83   |
| 20+                 | 736             | 17                     | 1                     | Reference |      |        | 360             | 5                      | 1               | Reference |      |        |

| Liver T2*<br>(ms) | No. in<br>group | No. with<br>arrhythmia | Per scan (non-nested) |           |      |      | No. in<br>group | No. with<br>arrhythmia | First scan only |           |      |      |
|-------------------|-----------------|------------------------|-----------------------|-----------|------|------|-----------------|------------------------|-----------------|-----------|------|------|
|                   |                 |                        | RR                    | 95% CI    | p    | RR   |                 |                        | 95% CI          | p         |      |      |
| <0.96             | 63              | 3                      | 0.60                  | 0.18      | 1.96 | 0.40 | 31              | 2                      | 1.35            | 0.28      | 6.48 | 0.71 |
| 0.96 to <1.4      | 136             | 10                     | 0.92                  | 0.45      | 1.89 | 0.83 | 78              | 5                      | 1.34            | 0.42      | 4.21 | 0.62 |
| 1.4 to <2.7       | 382             | 28                     | 0.92                  | 0.55      | 1.54 | 0.76 | 188             | 13                     | 1.44            | 0.58      | 3.61 | 0.44 |
| 2.7 to <6.3       | 484             | 27                     | 0.70                  | 0.42      | 1.18 | 0.18 | 209             | 9                      | 0.90            | 0.33      | 2.41 | 0.83 |
| 6.3+              | 377             | 30                     | 1                     | Reference |      |      | 146             | 7                      | 1               | Reference |      |      |

| Ferritin<br>µg/L | No. in<br>group | No. with<br>arrhythmia | Per scan (non-nested) |           |      |      | No. in<br>group | No. with<br>arrhythmia | First scan only |           |      |      |
|------------------|-----------------|------------------------|-----------------------|-----------|------|------|-----------------|------------------------|-----------------|-----------|------|------|
|                  |                 |                        | RR                    | 95% CI    | p    | RR   |                 |                        | 95% CI          | p         |      |      |
| 2500+            | 450             | 30                     | 1.03                  | 0.67      | 1.58 | 0.90 | 215             | 14                     | 0.77            | 0.40      | 1.51 | 0.45 |
| <2500            | 992             | 68                     | 1                     | Reference |      |      | 437             | 22                     | 1               | Reference |      |      |
